# Supplementary material for: Metformin promotes the survival of transplanted cardiosphere-derived cells thereby enhancing their therapeutic effect against myocardial infarction
Source: PubMed Central journal article supplement (PMC5273815; doi:10.1186/s13287-017-0476-7), 2017-01-28

# Supplementary Figure 2

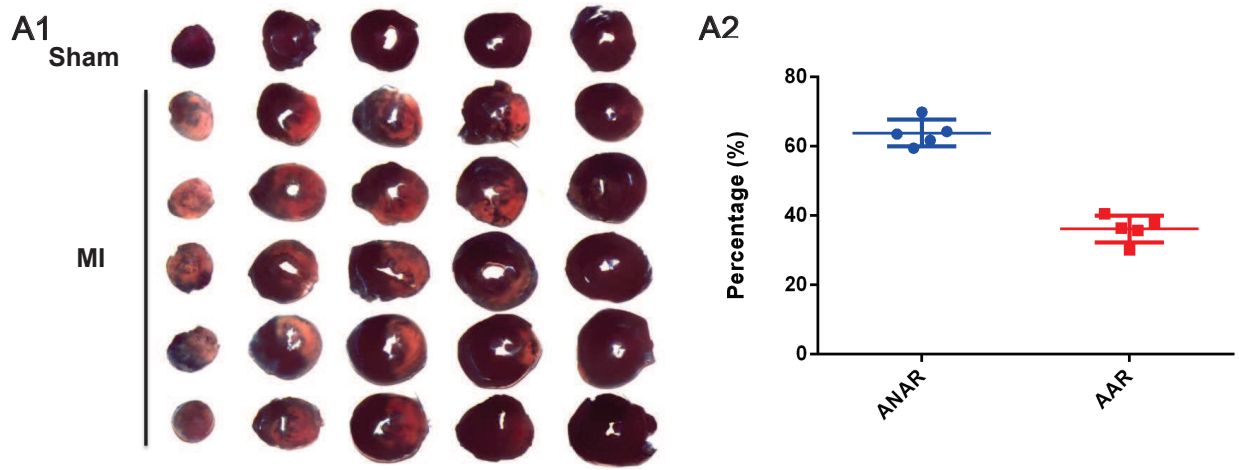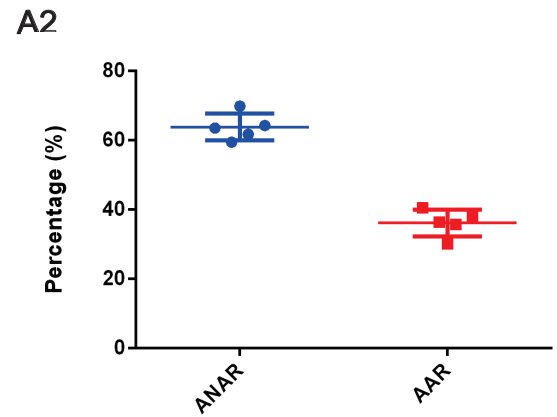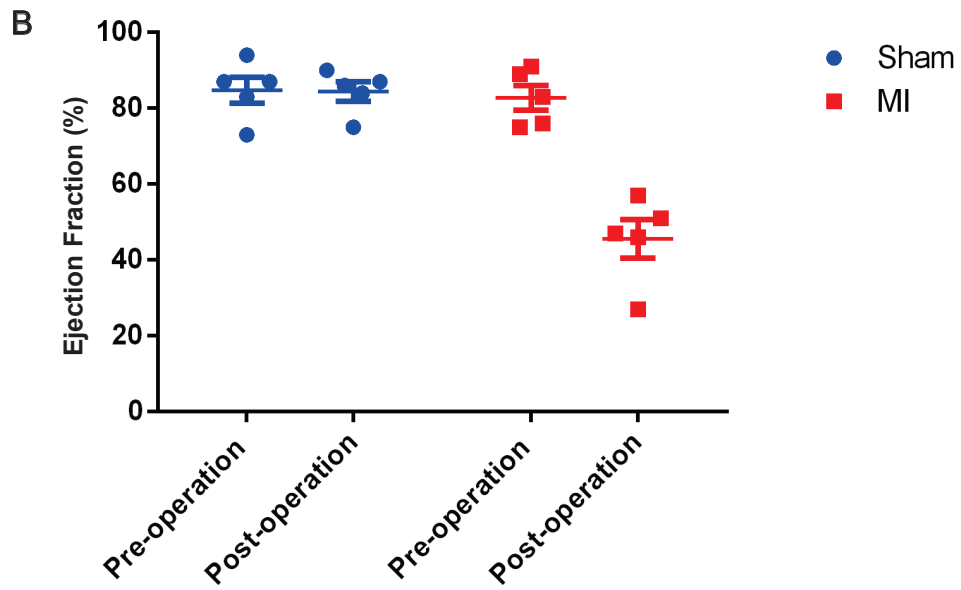

Supplement: 13287_2017_476_MOESM2_ESM.pdf [file 13287_2017_476_MOESM2_ESM.pdf]
